# Supplementary material for: Zero-thermal-quenching and photoluminescence tuning with the assistance of carriers from defect cluster traps
Source: Royal Society of Chemistry journal article supplement (doi:10.1039/c8tc03515f), 2018-01-01
Supplement: c8tc03515f1.pdf [file c8tc03515f1.pdf]

## Supporting Information:

### Zero-thermal-quenching and photoluminescence tuning with the assistance of carriers from defect cluster traps

Yali Chen,<sup>a</sup> Binxun Yu,<sup>\*a</sup> Jing Gou <sup>\*a</sup> and Shengzhong Frank Liu <sup>ab</sup>

<sup>a</sup>Key Laboratory of Applied Surface and Colloid Chemistry, Ministry of Education; Shaanxi Key Laboratory for Advanced Energy Devices; Shaanxi Engineering Lab for Advanced Energy Technology; School of Materials Science and Engineering, School of Chemistry and Chemical Engineering, Shaanxi Normal University, Xi'an 710119, China. \*E-mail: yubx@snnu.edu.cn, goujing@snnu.edu.cn

<sup>b</sup>Dalian National Laboratory for Clean Energy; iChEM, Dalian Institute of Chemical Physics, Chinese Academy of Sciences, Dalian, 116023, China.

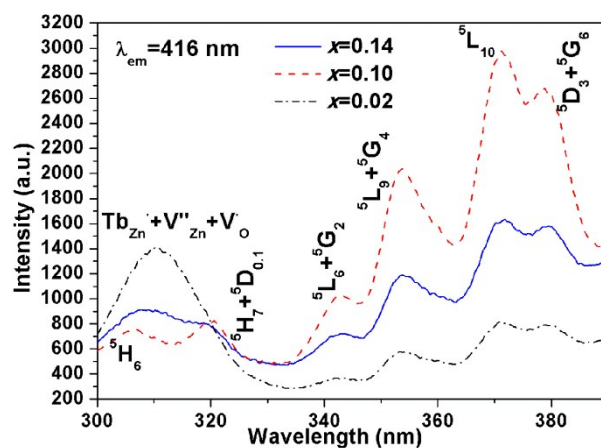

Fig. S1 The PLE spectra of SZSPO: $x\text{Tb}^{3+}$  phosphors ( $x=0.02, 0.10$  and  $0.14$ ) ( $\lambda_{\text{em}}=416$  nm).

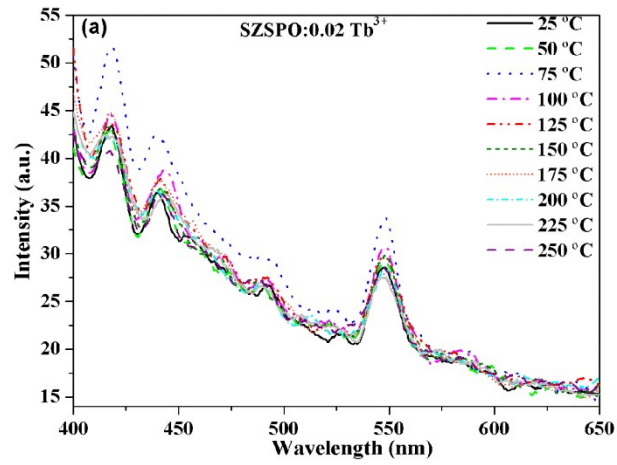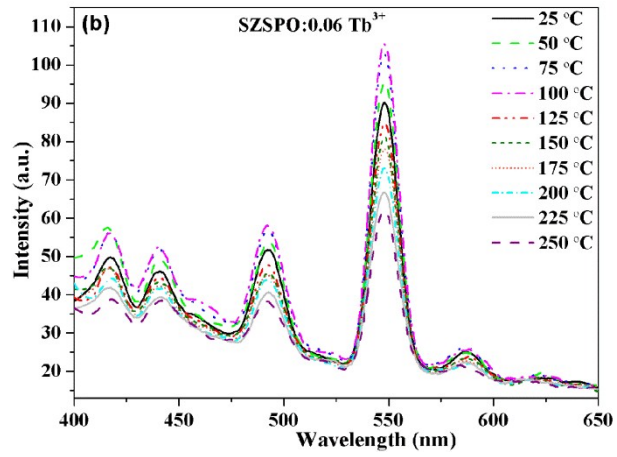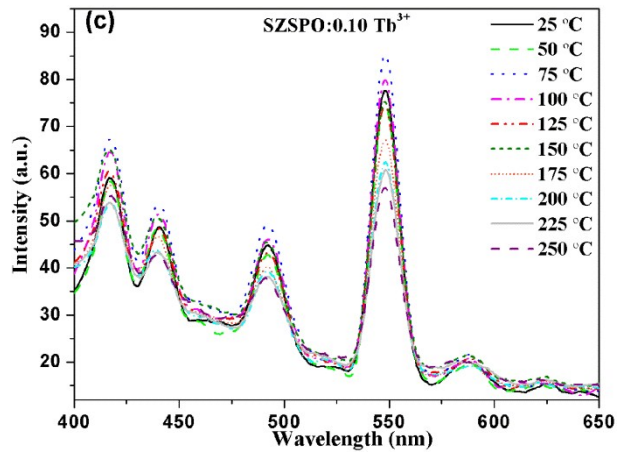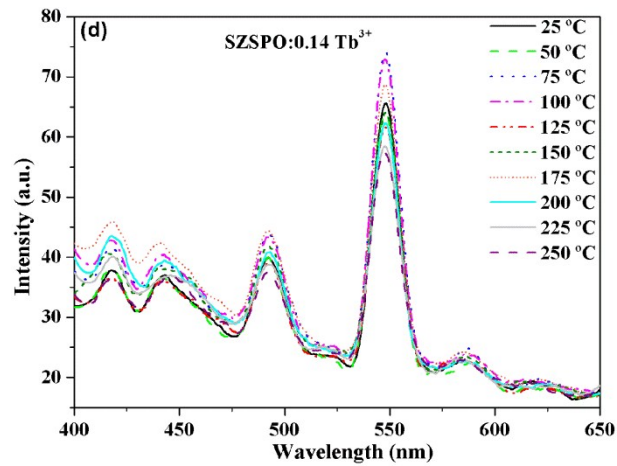

Fig. S2 Temperature-dependent emission spectra of SZSPO: $x$ Tb<sup>3+</sup> phosphor under 370 nm excitation in the temperature range of 25-250 °C, (a)  $x=0.02$ ; (b)  $x=0.06$ ; (c)  $x=0.10$ ; (d)  $x=0.14$ .
